# Supplementary material for: Crotoxin-Induced Mice Lung Impairment: Role of Nicotinic Acetylcholine Receptors and COX-Derived Prostanoids
Source: MDPI journal article supplement (doi:10.3390/biom10050794), 2020-05-20
Supplement: s1 [file s1]

## Appendix A

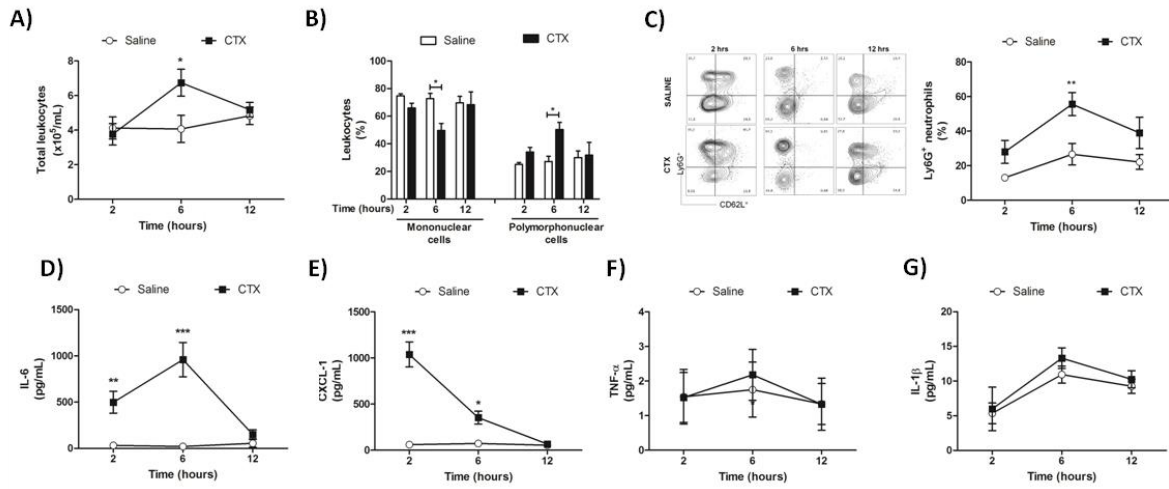

**Supplementary Figure S1.** Inflammatory parameters in air pouch fluid from CTX-treated mice. Pouch fluid (PF) were collected from mice after 2, 6, and 12 h of CTX s.c. injection to analyze the inflammatory parameters. **(A)** Total leukocyte counting. **(B)** Differential leukocyte counting. **(C)** Flow cytometry data are summarized in the representative contour plots and line plots showing kinetics of alteration in the Ly6G<sup>+</sup> cell population. **(D)** Interleukin 6 (IL-6). **(E)** Keratinocyte-derived chemokine (CXCL-1). **(F)** Tumor necrosis factor  $\alpha$  (TNF- $\alpha$ ). **(G)** Interleukin 1 $\beta$  (IL-1 $\beta$ ). The results are representative from two independent experiments ( $n = 6-7$ ). \*  $P < 0.05$ , \*\*  $P < 0.01$ , \*\*\*  $P < 0.001$  vs saline-treated animals (control) from the respective time group - two-way ANOVA followed by the Bonferroni's post-test.

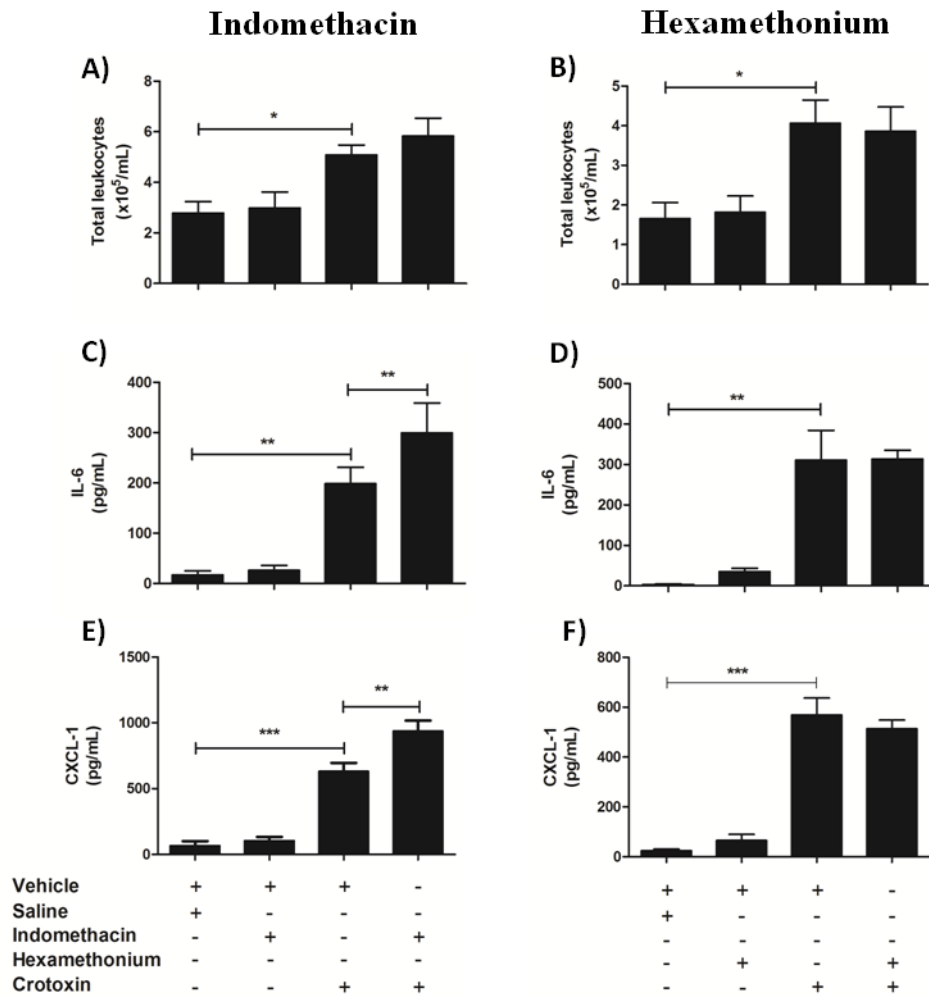

**Supplementary Figure S2.** Effects of indomethacin and hexamethonium on air pouch inflammation in CTX-treated mice. The animals were treated with hexamethonium (10 mg/Kg i.v., 30 min prior to CTX) or indomethacin (3 mg/Kg i.p., 4 h prior to and 30 min after CTX) before CTX (300  $\mu\text{g}/\text{Kg}$  s.c.) administration. After 6 h, the following inflammatory parameters were analyzed in air pouch: (A-B) Total leukocyte counting, (C-D) Interleukin 6 (IL-6), and (E-F) Keratinocyte-derived chemokine (CXCL-1) levels. The results are representative from two independent experiments ( $n = 6$  animals/group). \*  $P < 0.05$ , \*\*  $P < 0.01$ , \*\*\*  $P < 0.001$  vs. control (vehicle/saline) group—One-way ANOVA followed by the Tukey's multiple comparison test.

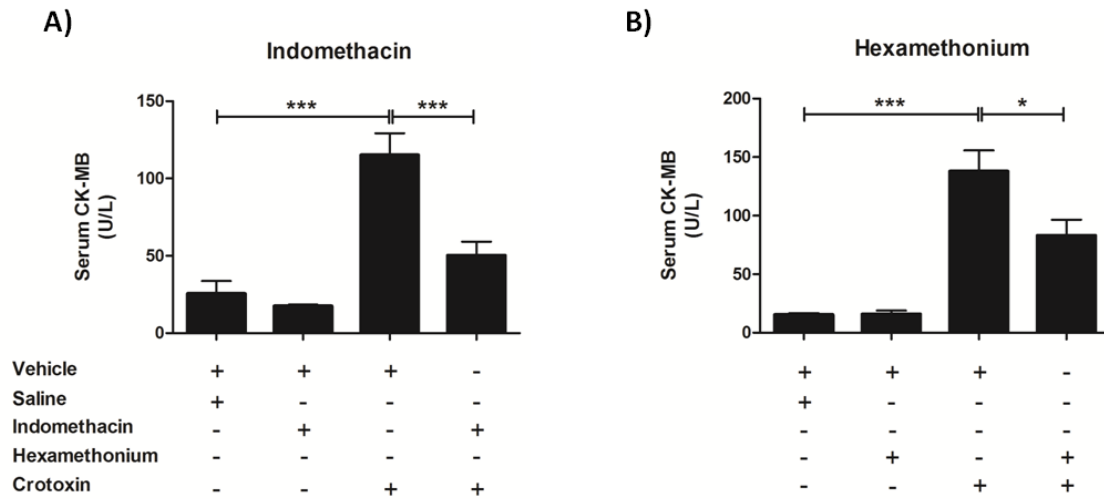

**Supplementary Figure S3.** Modulation of serum CK-MB levels by hexamethonium and indomethacin in CTX-treated mice. Animals were treated with (A) indomethacin (3 mg/Kg i.p.) or (B) hexamethonium (10 mg/Kg i.v.), or their respective vehicles, before CTX (300 µg/Kg s.c.) administration. After 12 h, blood was collected for serum CK-MB quantification. The results are representative from two independent experiments ( $n = 6-7$  animals/group). \*  $P < 0.05$ , \*\*  $P < 0.01$ , and \*\*\*  $P < 0.001$ —One-way ANOVA followed by the Tukey's multiple comparison test.
